# Supplementary material for: Peripartum Predictors of the Risk of Postpartum Depressive Disorder: Results of a Case-Control Study
Source: PubMed Central journal article supplement (PMC7727836; doi:10.3390/ijerph17238726), 2020-11-24
Supplement: ijerph-17-08726-s001.pdf [file ijerph-17-08726-s001.pdf]

# Edinburgh Perinatal/Postnatal Depression Scale (EPDS)

For use between **28–32 weeks** in **all** pregnancies and **6–8 weeks** postpartum

Name: \_\_\_\_\_ Date: \_\_\_\_\_ Gestation in Weeks: \_\_\_\_\_

As you are having a baby, we would like to know how you are feeling. Please mark "X" in the box next to the answer which comes closest to how you have felt in the **past 7 days**—not just how you feel today.

## In the past 7 days:

- |                                                                                                                                                                                                                                                                             |                                                                                                                                                                                                                                                                                                                                                              |
|-----------------------------------------------------------------------------------------------------------------------------------------------------------------------------------------------------------------------------------------------------------------------------|--------------------------------------------------------------------------------------------------------------------------------------------------------------------------------------------------------------------------------------------------------------------------------------------------------------------------------------------------------------|
| 1. I have been able to laugh and see the funny side of things<br>0 <input type="checkbox"/> As much as I always could<br>1 <input type="checkbox"/> Not quite so much now<br>2 <input type="checkbox"/> Definitely not so much now<br>3 <input type="checkbox"/> Not at all | 6. Things have been getting on top of me<br>3 <input type="checkbox"/> Yes, most of the time I haven't been able to cope<br>2 <input type="checkbox"/> Yes, sometimes I haven't been coping as well as usual<br>1 <input type="checkbox"/> No, most of the time I have coped quite well<br>0 <input type="checkbox"/> No, I have been coping as well as ever |
| 2. I have looked forward with enjoyment to things<br>0 <input type="checkbox"/> As much as I ever did<br>1 <input type="checkbox"/> Rather less than I used to<br>2 <input type="checkbox"/> Definitely less than I used to<br>3 <input type="checkbox"/> Hardly at all     | 7. I have been so unhappy that I have had difficulty sleeping<br>3 <input type="checkbox"/> Yes, most of the time<br>2 <input type="checkbox"/> Yes, sometimes<br>1 <input type="checkbox"/> Not very often<br>0 <input type="checkbox"/> No, not at all                                                                                                     |
| 3. I have blamed myself unnecessarily when things went wrong<br>3 <input type="checkbox"/> Yes, most of the time<br>2 <input type="checkbox"/> Yes, some of the time<br>1 <input type="checkbox"/> Not very often<br>0 <input type="checkbox"/> No, never                   | 8. I have felt sad or miserable<br>3 <input type="checkbox"/> Yes, most of the time<br>2 <input type="checkbox"/> Yes, quite often<br>1 <input type="checkbox"/> Not very often<br>0 <input type="checkbox"/> No, not at all                                                                                                                                 |
| 4. I have been anxious or worried for no good reason<br>0 <input type="checkbox"/> No, not at all<br>1 <input type="checkbox"/> Hardly ever<br>2 <input type="checkbox"/> Yes, sometimes<br>3 <input type="checkbox"/> Yes, very often                                      | 9. I have been so unhappy that I have been crying<br>3 <input type="checkbox"/> Yes, most of the time<br>2 <input type="checkbox"/> Yes, quite often<br>1 <input type="checkbox"/> Only occasionally<br>0 <input type="checkbox"/> No, never                                                                                                                 |
| 5. I have felt scared or panicky for no very good reason<br>3 <input type="checkbox"/> Yes, quite a lot<br>2 <input type="checkbox"/> Yes, sometimes<br>1 <input type="checkbox"/> No, not much<br>0 <input type="checkbox"/> No, not at all                                | 10. The thought of harming myself has occurred to me<br>3 <input type="checkbox"/> Yes, quite often<br>2 <input type="checkbox"/> Sometimes<br>1 <input type="checkbox"/> Hardly ever<br>0 <input type="checkbox"/> Never                                                                                                                                    |

Total Score

*Talk about your answers to the above questions with your health care provider.*

*Translations for care-provider use available on PSBC website: [perinatalservicesbc.ca](http://perinatalservicesbc.ca).*

*The Royal College of Psychiatrists 1987. From Cox, JL, Holden, JM, Sagovsky, R (1987). Detection of postnatal depression. Development of the 10-item Edinburgh Postnatal Depression Scale. British Journal of Psychiatry. 150, 782–786. Reprinted with permission.*
